1

2 Lethal and sublethal effects of synthetic and bio-insecticides on *Trichogramma*  
3 *brassicae* parasitizing *Tuta absoluta*

4

5

6 Zahra Nozad-Bonab<sup>1</sup>, Mir Jalil Hejazi<sup>2</sup>, Shahzad Iranipour<sup>2</sup>, Mehdi Arzanlou<sup>2</sup>, Antonio Biondi<sup>3</sup>

7 1. Graduated PhD student of Tabriz University, Tabriz, Iran.

8 2. Department of plant protection, College of Agriculture, Tabriz University, Tabriz, Iran.

9 3. Department of Agriculture, Food and Environment, University of Catania, Catania, Italy

10

11

12 Corresponding author

13 Email: [nozadbonab@yahoo.com](mailto:nozadbonab@yahoo.com) (ZN)

14

15

16

17 **Abstract**

18       The invasive tomato leaf miner (TLM), *Tuta absoluta* (Meyrick) is an invasive pest on  
19 tomatoes worldwide. The main control measure against the pest has been chemical insecticides,  
20 but the pest developed resistance to many chemical classes. So alternative methods, such as  
21 biological control agents, alone or combined to chemical compounds must be evaluated to validate  
22 their synergistic actions. In this study, both lethal (concentration-mortality response) and sublethal  
23 effects of three synthetic insecticides, the bioinsecticide spinosad, as well as the entomopathogenic  
24 fungus *Metarhizium anisopliae* (Metschnikoff) Sorokin were studied on *Trichogramma brassicae*  
25 Bezdenko within *T. absoluta* eggs. To assess the sublethal effects, the lethal concentration 25%  
26 (LC<sub>25</sub>) of chlorantraniliprole, spinosad, abamectin and indoxacarb and LC<sub>50</sub> value of *M. anisopliae*  
27 was sprayed on eggs and then offered at three time intervals to the parasitoids. Fertility and other  
28 life table parameters of the individuals emerged from treated eggs were estimated. The results  
29 showed that indoxacarb showed the highest deleterious sublethal effects on *T. brassicae*. On the  
30 other hand, *M. anisopliae* was the safest treatment to combine to *Trichogramma* with no significant  
31 effect on some parameters. The lowest LC<sub>50</sub> value for *T. brassicae* was obtained for  
32 chlorantraniliprole followed by spinosad. Synergistic effect was observed when *M. anisopliae* and  
33 *T. brassicae* used together. Hence, this will be a promising integration against *T. absoluta*.

34 **Key words:** Chlorantraniliprole, Indoxacarb, Abamectin, Spinosad, *Metarhizium anisopliae*,  
35 biopesticides

36

37

38

39

## 40 **Introduction**

41       The tomato leaf miner (TLM), *Tuta absoluta* (Meyrick) (Lep., Gelechiidae) is one of the  
42 most important pests of tomatoes worldwide [1]. Origin of this pest is from South America, but it  
43 spread rapidly through continents within 5-10 years. The first report of this pest out of Latin  
44 America was in Spain in 2006 [2]. Then *T. absoluta* reported from Africa and Asia. It invaded  
45 African tomato fields in 2016 and spread in almost 54 countries causing 50-100 % crop loss in  
46 tomato and some other products. Distribution of *T. absoluta* was documented that is related to  
47 temperature and moisture. It is also adapted to cold, warm, wet or dry environments, of different  
48 African countries [3]. Based on Han, et al. [4] review, this pest because of it's ability to adapt to  
49 newly invaded area, high reproduction potential and ... could destroy the tomato fields and  
50 greenhouse in Asian countries like Iran, after first report in Turkey in 2009. This pest invaded  
51 Iran's fields in 2009 possibly via Turkey or Iraq borders [5].

52       This is a serious pest on some solanaceous crops having tomato as main host plant [6, 7].  
53 According to Biondi et al. [1], potato and European black nightshade (*Solanum nigrum*) are  
54 suitable hosts for this pest. Furthermore, *T. absoluta* can oviposit and feed on some species of  
55 Amaranthaceae, Convolvulaceae, Fabaceae, and Malvaceae. Female needs to contact with  
56 oviposition stimulates of the host plants to begin ovipositing. The female can lay up to 260 eggs.  
57 The larvae are leaf miners and feed on leaf mesophyll between two epidermis. This behavior,  
58 protects larvae against non-systemic insecticides; moreover, this pest is well known to have  
59 developed resistance to various insecticide classes [8]. Because of this feeding behavior, short  
60 development time, several number of generations and rapid adaptation to different ecological  
61 conditions, this pest has been a most problematic and serious insect pest of tomatoes and can cause  
62 100% damage if no management measure was adopted [1]. On the other hand, the use of

63 insecticides in crop systems causes undesirable effects such as developing resistance and  
64 deleterious effects on beneficial arthropods [9-11]. In this context, obvious choices in sustainable  
65 pest management systems are biological control agents such as parasitoids, predators and  
66 entomopathogens [12-18]. Among the various parasitoid species parasitizing *T. absoluta* in both  
67 the native and the new invaded range [1, 19, 20]. Idiobiont oligophagous species of *Trichogramma*  
68 have shown to have a good potential to be employed in integrated pest management (IPM)  
69 programs [21-24]. Few investigations are dealing with integration of *Trichogramma* spp. with  
70 other control measures such as predators, entomopathogens and pheromone traps to control *T.*  
71 *absoluta* in Iran. These studies showed high importance of these egg parasitoids in IPM programs  
72 of *T. absoluta* [25-27]. Wide range of tolerance to environmental changes, easy method of rearing,  
73 killing their hosts prior to damage and a measurable host preference despite of a wide host range  
74 are advantages that make *Trichogramma* spp. valuable biological control agents [21, 28]. The host  
75 species may dramatically affect the fitness of *Trichogramma* parasitoids, such as size, longevity,  
76 fecundity and host acceptance [23, 29-31]. Some Trichogrammatidae species, such as *T. achaeae*  
77 (Nagaraja & Nagarkatti) [22, 32], *T. euproctidis* (Girault) [33, 24], and *T. evanescens* Westwood  
78 [34], have been reported as effective egg parasitoids of *T. absoluta*. Unfortunately, none of these  
79 species is still extensively used commercially. In Iran, *T. brassicae* Bezdenko (Hym.:  
80 Trichogrammatidae) is the only species that is reared in restricted scale and thus have potential for  
81 future implication in IPM programs in Iran.

82 Other important agents in biological control of *T. absoluta* are pathogens which are used  
83 commercially nowadays. Among pathogens, fungi are promising due to diversity and adaptation  
84 to agroecosystems [35]. Most of the commercially used fungal entomopathogens are belonging to  
85 the genera of *Metarhizium*, *Beauveria*, *Lecanicillium* and *Isaria*. They can directly penetrate into

86 the insect cuticle and are able to cause epizootics. Also they can be easily produced in large  
87 quantities [36, 37]. *Metarhizium anisopliae* (Metschnikoff) Sorokin (Hypocreales:  
88 Clavicipitaceae) is a well-known entomopathogen belongs to Pezizomycotina: Sordariomycetes  
89 [38]. Some members of this fungi are known as saprophytes and some species or sub-species are  
90 registered as entomopathogen [35]. Sometimes *Metarhizium* spp. produce sclerotia in cultural  
91 media which makes this fungus resistant to harsh conditions of cold seasons [39]. There are some  
92 reports of high virulence of this fungus on *T. absoluta* eggs, larvae, pupae and adults [13, 40, 41].  
93 *Metarhizium anisopliae* is a promising entomopathogenic fungus which can be used in commercial  
94 scale [39]. Therefore, a suitable integration with other control tools is needed to provide effective  
95 and sustainable control.

96 According to Suh, et al. [42], spinosad and prophenofos had high toxic effects on *T. exiguum*  
97 Pinto & Platner in *Helicoverpa zea* (Boddie) eggs and reduced its longevity and hatch rate. Their  
98 results documented that spinosad was effective even after four days and had significant side effects  
99 on parasitoids. Spinosad, as a bioinsecticide is used both in traditional and organic cultures,  
100 therefore studying on side effects of spinosad weather on pest or biological control agents is so  
101 important. In a literature review, Biondi, et al. [43] found that spinosad is more toxic for  
102 Hymenoptera than other parasitoid orders, although it is more selective to bees. Moreover, modern  
103 insecticides can be seem to be safe, while residue of them can affect fecundity, longevity and sex  
104 ratio of biological control agents. Hence, a comprehensive evaluation of insecticide effects should  
105 be done by considering sublethal effects on natural enemies as well [9, 44, 45]. Therefore,  
106 combining insecticides and parasitoids may not have the expected results.

107 Because compounds used against *T. absoluta*, affect directly and/or indirectly its natural  
108 enemies, evaluating such effects is necessary for choosing suitable insecticides in tomato leaf

109 miner IPM programs. This study was conducted to evaluate lethal and sublethal effects of some  
110 insecticides and *M. anisopliae* on *T. brassicae*, the prevalent egg parasitoid species of  
111 *Trichogramma* in Iran. The selected insecticides were the most effective ones among compounds  
112 tested on *T. absoluta* based on a previous study [46].

113

## 114 **Materials and methods**

### 115 **Rearing *Tuta absoluta***

116 Different larval instars of *T. absoluta* were collected from a damaged tomato field in  
117 Bilasuvar County (39 ° 39' 31.37"N 48 ° 34' 67.06"E) in Ardabil province in Northwest of Iran  
118 and moved to a greenhouse section of the Department of Plant Protection, University of Tabriz,  
119 Tabriz, Iran. The larvae were kept at  $27 \pm 2$  °C,  $50 \pm 10$  % RH and 16: 8 h (L: D) photoperiod and  
120 fed on foliage of greenhouse grown tomato plants and maintained until adult emergence. The  
121 adults then were transferred to 80 × 70 × 60 cm wooden cages covered with organdy cloth within  
122 which two or three potted tomato plants (20 - 30 cm height) were included and let them to mate  
123 and lay their eggs on the plants for 24 hours. The adults were fed with 10% sugar solution (renewed  
124 every three days). After 24 h the plants were shaken within the cage to remove the moths from  
125 them. Twenty four hour old eggs were used in bioassays.

126

### 127 ***Trichogramma brassicae* rearing**

128 The egg parasitoid *T. brassicae* was provided from a private insectarium in Parsabad,  
129 Ardabil province. The stock culture of the parasitoid was reared on *Ephestia kuehniella* (Zeller)  
130 (Lep.: Pyralidae) eggs within glass tubes (1cm diameter, 6 cm length) in a growth chamber at 27

131  $\pm 1^{\circ}\text{C}$ ,  $50 \pm 5$  % RH and 16:8 h (L:D) photoperiod. These parasitoids were reared on *T. absoluta*  
132 eggs for two further generations, prior to using in experiments.

133

#### 134 ***Metarhizium anisopliae* cultures**

135 Source of the entomopathogenic fungus *M. anisopliae*, was provided by the laboratory of  
136 Biological Control of Insects, University of Tehran. The fungus was cultured on potato dextrose  
137 agar (PDA) medium in Petri-dishes (9 cm in diameter) at  $25 \pm 1$  °C. Ten days later, the cultures  
138 with well-developed spores were washed with distilled water + 0.2 % surfactant Tween-80®. After  
139 filtering the spore suspension by glass wool, the number of spores was counted using a  
140 haemocytometer (Assistent®).

141

#### 142 **Lethal effects of insecticides on *Trichogramma brassicae***

143 Based on a previous work (Nozad-Bonab, et al., 2017), four chemical insecticides (spinosad  
144 (Laser® 48 SC), indoxacarb (Steward® 30 WG), abamectin (Vertimec® 1.8 EC) and  
145 chlorantraniliprole (Coragen® 18.5 SC) were chosen as effective insecticides for *T. absoluta*  
146 control.

147 The lethal effects of above insecticides were studied on *T. brassicae*. To assess lethal effects,  
148 120 tomato leaf miner eggs were put on a piece of paper ( $1.5 \times 3$  cm) in a glass tube (6 cm length,  
149 1cm diameter) and exposed to *T. brassicae* females. Five days later when blackhead stage of  
150 parasitized eggs appeared, these were sprayed by those insecticides using a Potter spray tower  
151 (Burcard Scientific ®) (5 ml insecticide solution under 0.5 bar pressure). The ranges of  
152 concentrations were 0.09 – 1.26; 0.6 – 4.5; 0.55 – 11.1; 0.024 - 0.72 mg a.i. L<sup>-1</sup> of abamectin,  
153 indoxacarb, chlorantraniliprole, spinosad, respectively. Tween-80® was used as surfactant at a

154 concentration of 0.05 % (v/v) in all treatments. In the control the eggs were sprayed with distilled  
155 water + Tween-80®. Five days later the number of emerged parasitoid was recorded and the LC<sub>50</sub>  
156 values were estimated. The experiment had three replicates with 40 insects each. The mortalities  
157 were corrected using Abbott's formula [47] and the LC<sub>50</sub> values were estimated using the probit  
158 procedure of SPSS [48].

159

### 160 **Sublethal effects of insecticides on *Trichogramma brassicae***

161 For evaluation of sublethal effects of the above mentioned insecticides as well as  
162 entomopathogenic fungus, *M. anisopliae* on *T. brassicae*, the LC<sub>25</sub> values of chemical insecticides  
163 and the LC<sub>50</sub> value of entomopathogenic fungus (0.07, 1.82, 1.44 and 0.056 mg ai/l of spinosad,  
164 indoxacarb, abamectin and chlorantraniliprole respectively, and 10<sup>4</sup> spore/ml of the fungus;  
165 obtained in a previous work, [46], were sprayed on 50 *T. absoluta* eggs upon a piece of paper (3  
166 cm length, 1.5 cm width). The treated eggs were exposed to the parasitoids 0, 24 and 48 h later.  
167 Thirty couples of the parasitoids were selected and transferred in glass tubes (6 cm length, 1cm  
168 diameter). Very small honey droplets (20%) were placed on a piece of paper (2 cm length, 1 cm  
169 width) and deposited in tubes. All the tubes were kept in a growth chamber (27 ± 1 °C, 60 ± 10 %  
170 RH and 16: 8 h photoperiod) until the end of the study. Development time, emergence rate,  
171 longevity and fecundity of the progeny, were thus assessed.

172 The range of spore concentration of the *M. anisopliae* was determined as 1.2 × 10<sup>2</sup> – 1.2 ×  
173 10<sup>6</sup> spore/l. Fifty *T. absoluta* eggs were sprayed by LC<sub>50</sub> of *M. anisopliae* by using above  
174 mentioned Potter spray tower and exposed to *T. brassicae* after drying in room condition. The  
175 experiment was repeated three times at different days.

176



177 **Combination of *Trichogramma brassicae* and insecticides or entomopathogenic *Metarhizium***  
178 ***anisopliae***

179 In other experiment, 20 eggs of *T. absoluta* treated by LC<sub>25</sub> of insecticides or LC<sub>50</sub> of *M.*  
180 *anisopliae* by using a Patter Spray Tower, exposed to *T. brassicae* females immediately after  
181 drying, 24h or 48 h after incubation in laboratory condition, and then they were kept in a growth  
182 chamber until larvae emergence. This experiment was repeated for 30 parasitoids. The number of  
183 *T. brassicae* adults and *T. absoluta* larvae were counted at the end of the experiment and mortality  
184 rate was estimated as number of parasitized eggs to available ones. This study had three sets of  
185 control treatments, 1. The untreated eggs on leaflet to ensure their healthy, 2. The parasitized eggs  
186 without insecticides to ensure the successful parasitism and 3. The treated eggs by insecticides and  
187 *M. anisopliae* for ensuring the effectiveness of insecticides and entomopathogen. Each experiment  
188 had four replications.

189

190 **Data Analysis**

191 Life table parameters, including gross reproductive rate (GRR), net reproductive rate ( $R_0$ ),  
192 intrinsic rate of increase ( $r_m$ ), finite rate of increase ( $\lambda$ ), generation time (T), doubling time (DT),  
193 intrinsic birth rate (b) and intrinsic death rate (d), were estimated according to Carey [49] and  
194 Biondi, et al. [44]. Variance of the parameters was estimated using Jackknife pseudovalues. One-  
195 Way ANOVA and post hoc test of Tukey ( $\alpha=0.05$ ) were used to compare means of the treatments.

196 To categorize the binary relationship between different control agents, in antagonistic,  
197 additive or synergistic category, a modified method of Koppenhöfer and Kaya [50] by Yii, et al.  
198 [51] was adopted. This method is based on testing discrepancy of the observed mortality from an  
199 expected mortality calculated as  $ME = MC + MB (1 - MC/100)$  by using a chi-square test (df =

200 1), where ME, MC and MB are expected mortality, mortality by chemical factor and mortality by  
201 biological factor, respectively.

202 In chi-square test,  $\chi^2 = (MCB - ME)^2/ME$ , where MCB is the observed mortality for the  
203 parasitoid–insecticide combinations. If the calculated  $\chi^2$  value exceeds the critical value of the Chi  
204 square table (3.84, df=1), implies non-additive (synergistic or antagonistic) relation between the  
205 two agents [52]; otherwise it is an additive relation. In circumstance which, null hypothesis of  
206 additive relation was rejected, if the  $D = MCB - ME$  is a positive value, then the relation is  
207 considered a synergistic type, nonetheless it is an antagonistic one.

208

## 209 **Results**

### 210 **Lethal effects**

211 The  $LC_{50}$  values estimated for the examined insecticides on *T. brassicae* are shown in table  
212 1. The results indicated that chlorantraniliprole had the lowest  $LC_{50}$  value, followed by spinosad,  
213 indoxacarb and abamectin. The  $LC_{50}$  value on *T. brassicae* was 5.33 times higher than that of the  
214 *T. absoluta* in our previous study [46]. Moreover, Indoxacarb was 2.975 times more toxic on the  
215 parasitoid than tomato leaf miner. While spinosad and abamectin had almost similar toxic effect  
216 both on host and parasitoid. The  $LC_{50}$  values of spinosad, abamectin, indoxacarb and  
217 chlorantraniliprole on *T. absoluta* (0.14, 3.61, 3.99 and 0.11 mg ai./l, respectively) were estimated  
218 by Nozad-Bonab, et al. [46].

219

### 220 **Sublethal effects**

221 Longevity was 3.32 days in control and 1.32, 1.47, 1.54, 1.32 and 3.06 d, in adult parasitoids  
222 that emerged from *T. absoluta* eggs sprayed with abamectin, chlorantraniliprole, spinosad,

223 indoxacarb and *M. anisopliae*, respectively. The chemical insecticides caused significant effects  
224 on life table parameters in comparison with control (Table 2). On the other hand *M. anisopliae* had  
225 a moderate and delayed effect on biostatistics of *T. brassicae*. For example effect on  $r_m$ ,  $b$ , and  $\lambda$   
226 was observed only after 24h. Also some parameters such as GRR, DT and T did not affect by  
227 *Metarhizium anisopliae*.

228 Chemical insecticides changed the gross fecundity rate compared to control. However, no  
229 significant interaction was observed between insecticides and exposure times. In addition, the  
230 entomopathogenic fungus *M. anisopliae* had no significant time-dependent effect. Nevertheless,  
231 net reproduction rate as well as birth rate showed significant difference with control in the  
232 parasitoid and pathogen integration. It seems that in contrast to chemical insecticides,  
233 entomopathogenic fungus had no effect on intrinsic rate of increase. Sublethal effects of the tested  
234 insecticides was not significant on generation time, but doubling time was longer for indoxacarb.  
235 Birth rate and death rate was respectively maximum and minimum in control. The  
236 entomopathogenic fungus *M. anisopliae* developed and killed the eggs, and the survived eggs were  
237 so low quality that adversely affected the parasitoid preference, but this negative effect was less  
238 than insecticides.

239 Although insecticides and entomopathogen had some negative effects on parasitoid, but the  
240 combination of them could increase the *T. absoluta* eggs mortality. According to results of table  
241 3, the combination of *M. anisopliae* and *T. brassicae* had a synergistic effect in simultaneous  
242 applications. Other combinations showed rather additive effects except abamectin + parasitoid and  
243 chlorantraniliprole + parasitoid that were mainly antagonistic. Perhaps, longer developmental time  
244 of the infected host extends available time for parasitism, thus combination of these agents can be  
245 more effective than the insecticides + the parasitoid.

## 246 **Discussion**

247 Biological control agents are often more sensitive to insecticides than targeted pests. It is  
248 may be due to shorter exposure time to insecticides and lower doses that they receive [53]. Since  
249 mechanism of physiological selectivity of spinosad is unknown, researchers cannot explain why  
250 resistance to spinosad has evolved by insects. However low penetration rate into integument,  
251 change in site of action or increased rate of the insecticide metabolism are possible explanations  
252 for spinosad selectivity for wasps. Fernandes et al. [54] suggested spinosad as a moderately toxic  
253 compound on Vespidae and Apidae. They explained that low penetration rate is because of  
254 cohesion with the integument and large molecular weight of spinosad. In our study, no selectivity  
255 was observed between the parasitoid *T. brassicae* and its host *T. absoluta*. Also Suh et al. [42]  
256 evaluated spinosad as a toxic compound to *Trichogramma exiguum*. But Hewa-Kapuge et al. [55]  
257 reported indoxacarb as a low toxicant compound on *Trichogramma nr. brassicae* in laboratory  
258 conditions while it reduced adults emergence in field. Also they reported emamectin as a  
259 moderately toxic insecticide against parasitoids. The difference observed between our study and  
260 those of the Hewa-Kapuge et al. [55] is partly due to different egg shell characteristics of different  
261 hosts used in these studies. In their study *H. armigera* with a thicker egg shell was used as host.

262 In addition to the lethal effects, the sublethal effects and life table parameters can also  
263 determine the degree of toxicity of a pesticide to natural enemies and pests. So that, Lundgren and  
264 Heimpel [56] documented that the longevity of *T. brassicae* was 4 and 2 days with and without  
265 feeding on honey. Also Orr et al. [21] also recorded longevity to be 4 days for *T. brassicae*. Both  
266 studies partially agreed our study. On the other hand, Afshari et al. [57], showed that indoxacarb  
267 reduced longevity and efficiency of *T. brassicae*. Suh et al. [42] also reported that spinosad reduced  
268 emergence rate and longevity of *T. exiguum* on *Helicoverpa armigera* (Boddie) eggs. But spinosad

269 did not change fecundity, sex ratio or frequency of brachyptery. Spinosad was classified as  
270 moderate toxic on *T. exiguum* females. It seems that spinosad could not penetrate in the host egg  
271 and the parasitoid adults affected by spinosad only at emergence. Difference in parasitoid species  
272 and the insecticides' dose may partly explain differences in our results with this study.

273       There is another opinion about spinosad, Medina et al. [58] showed that first and second  
274 larval stages of *Hyposoter didymator* (Thunberg) (Hym., Ichneumonidae) were affected less than  
275 the third instar larvae within body of host, larva of *Spodoptera littoralis* (Boisduval) (Lep.:  
276 Noctuidae). Since the 1<sup>st</sup> and the 2<sup>nd</sup> instar larvae feed the host hemolymph, they gain the lower  
277 spinosad residue than the 3<sup>rd</sup> instar larvae that feed the cellular tissue. Also adults are more highly  
278 affected in oral rather than contact exposure. The adults chew the silken cocoon and in this way  
279 they can intake some residue of spinosad and die. They reported that spinosad had higher oral  
280 proportional to contact toxicity for this parasitoid because the thick cuticle of the host act as a  
281 preventive barrier. Undesirable effects of spinosad on *T. brassicae* life table parameters, may be  
282 due to the mentioned reasons. It depends on both host and natural enemy species that which one  
283 of the contact or oral effects of spinosad is stronger. Ruiz et al. [59] indicated that the contact effect  
284 of spinosad is more than oral effect on *Diachasmimorpha longicaudata* (Ashmead) (Hym.:  
285 Braconidae). Furthermore, they found that sublethal doses of spinosad had deleterious effects on  
286 fecundity, survival and partly on sex ratio.

287       Fernandes et al. [60] documented that the reason of reduction in fecundity and size of  
288 parasitoids progeny may be due to accumulation of spinosad in ovaries. This can explain the reason  
289 of reduction of fecundity in our study. Similarly, Schneider et al. [61] reported lethal and sublethal  
290 effects of spinosad on *Hyposoter didymator* (Thunberg) (Hym.: Ichneumonidae). However, the  
291 mechanism of spinosad toxicity on parasitoid wasps is almost unknown. The parasitoids intake so

292 few host egg chorion, that one may not expect detectable effects. Perhaps those amounts that  
293 penetrate into eggs are responsible for spinosad effects. Cònsoli et al. [62] reported that the effect  
294 of this insecticide on *Trichogramma galloi* Zucchi refer to its effect on neural system and  
295 especially nicotinic receptors that causes parasitoid paralyze. Also the female parasitoids are  
296 directly exposed to insecticides during egg probe and host feeding. Spinosad had deleterious effect  
297 on female at first day. All these theories can explain the sublethal effects of spinosad. Also,  
298 Hossain and Poehling [63] showed that, a part of the insecticides penetrate to underside layers of  
299 host eggs and larval skin and the remainder of them absorbed by host tissue, and fed by the  
300 parasitoid and in this way, parasitoid is exposed to sublethal doses of abamectin and spinosad. On  
301 the other hand, Blibech et al. [64] documented spinosad as a safer compound for three species of  
302 *Trichogramma* compared to deltamethrin. This is in contrast to our study that categorizes spinosad  
303 as similar to the other insecticides. They found spinosad as low to moderate toxic compound  
304 against these parasitoids and argued about difference among species response to different  
305 insecticides.

306 On the other side, Ahmadipour et al. [65] studied six populations of *Trichogramma* in Iran  
307 (Amol, Baboulsar, Mashhad, Langroud, Shiroud and Some-e Sara) on *T. absoluta* eggs in  
308 laboratory conditions. They reported significant difference between populations. The highest  
309 parasitism rate was 54 % in Baboulsar population. Also, there was no significant difference for  
310 egg parasitism on both sides of tomato leaves when egg density was the same on both sides. The  
311 tested *Trichogramma* population in our study was from Bilesovar with 33.6 percent parasitism on  
312 *T. absoluta* eggs which was close to Shiroud population (36.4 %) of Ahmadipour et al. [65].

313 On the other side, Abamectin not only has a high lethal effect on *T. absoluta* [46], but also,  
314 causes sublethal effects on biological control agents like *T. brassicae*, hence it should be used

315 cautiously [44]. Undesirable sublethal effects of both abamectin and spinosad such as reduced  
316 fecundity and longevity, was reported on *Bracon nigricans* Szépligeti (Hymenoptera: Braconidae).  
317 Their results agree our ones in presence of detectable sublethal effects on the life table parameters  
318 of parasitoid; *T. brassicae* in this case. On the other hand Hewa-Kapuge et al. [55] evaluated  
319 emamectin as a very toxic compound for *Trichogramma* nr. *brassicae*, but indoxacarb was safe  
320 for this parasitoid under laboratory conditions. However, indoxacarb had a toxic effect on *T.* nr.  
321 *brassicae* in field experiments may be due to high temperature in field. Also Wang et al. [66]  
322 observed adverse effect of abamectin on *T. nubilale* Ertle & Davis in their experiment. Cônsoli et  
323 al. [67] categorized the abamectin as moderate toxic on *T. pretiosum* which reduced adults  
324 emergence and parasitism. However, in our study toxicity of abamectin was in the range of the  
325 other insecticides. This is possibly due to effect of insecticides on oogenesis and developmental  
326 stages of the parasitoid that can affect the results. Also according to Carvalho et al. [68], residue  
327 of abamectin or spinosad on host egg chorion may cause adults mortality or reduce longevity and  
328 fecundity in *T. pretiosum*. On the other hand, these insecticides were slightly more toxic to female  
329 than male, which lead to sex ratio variation.

330         Since high amounts of compounds can be transferred from hemolymph to ovaries, spinosad  
331 or other insecticides may be traced in eggs and cause deleterious effects on next generation [58].  
332 Medina et al. [58] documented that 55% of spinosad was appeared in ovaries of *Hyposoter*  
333 *didymator* (Thunberg) (Hym.: Ichneumonidae). Like the present study, results of Sattar et al. [69]  
334 appreciated spinosad and emamectin benzoate as a very toxic compound on *T. chilonis*. In their  
335 study, indoxacarb reduced fecundity and was slightly harmful except on egg. Eventually sublethal  
336 doses of insecticides may affect behavior and physiological state of a parasitoid without a parallel  
337 increase in mortality and so create a new population equilibrium. Delpuech et al. [70, 71] reported

338 weakening response of males to females by insecticide treatments. Consequently fecundity  
339 reduced and sex ratio became male-biased.

340 Despite the adverse effects of insecticides on parasitoids, the combination of them was  
341 additive and synergic. Ashraf khan [72] also documented that, the residual of insecticides like  
342 abamectin can reduce the emergence and parasitism of *T. chilonis*, but they can be used in  
343 integrated pest management with parasitoid. But Blibech et al. [64] were disagree with these  
344 results, they revealed that, the usage of deltamethrin and spinosad with *Trichogramma oleae*, *T.*  
345 *cacoeciae* and *T. bourarachae* was usefulness in olive tree ecosystem integrated pest management.

346 The main purpose of IPM studies is finding of the strategies for more biological control using  
347 and produce healthy food. Better knowledge of chemical insecticides, biological mortality factors  
348 and combining synergistic control measures can help for gain the promising results. Based on the  
349 results of this study, it seems that spinosad and abamectin were more toxic for *T. brassicae* in  
350 comparison with indoxacarb and chlorantraniliprole. Also the entomopatogen fungus was safe for  
351 parasitoid in sublethal dose, then *M. anisopliae* was more compatible compound with parasitoid  
352 compared with chemical insecticides. Entomopathogen fungus not only was safer for parasitoid  
353 but also, they showed synergistic effect in leaf miner eggs mortality in combination together.  
354 Nevertheless, these results need further experiments and require validation by field studies to gain  
355 better insights on *Trichogramma* species effectiveness for integrated control programs.

356

## 357 **Acknowledgments**

358 The authors thank Dr. Masoud Taghizadeh for kindly providing the initial colony of *T.*  
359 *brassicae*. We also appreciate Miss Solmaz Khani for her great assistance in conducting  
360 experiments.



361 **References**

- 362 1. Biondi A, Guedes RNC, Wan F-H, Desneux N. Ecology, Worldwide Spread, and Management  
363 of the Invasive South American Tomato Pinworm, *Tuta absoluta*: Past, Present, and  
364 Future. *Annu Rev Entomol.* 2018; 63: 239–258.
- 365
- 366 2. Campos MR, Biondi A, Adiga A, Guedes RNC, Desneux N. From the Western Palearctic  
367 region to beyond: *Tuta absoluta* 10 years after invading Europe. *J Pest Sci.* 2017; 90:  
368 787–796.
- 369 3. Mansour R, Brévault Th, Chailleux A, Cherif A, Grissa-Lebdi K, Haddi Kh, et al. Occurrence,  
370 biology, natural enemies and management of *Tuta absoluta* in Africa. *Entomol Gen.*  
371 2018; 38: 83–112.
- 372 4. Han P, Bayram Y, Shaltiel-Harpaz L, Sohrabi F, Saji A, Jalilov A, et al. *Tuta absoluta*  
373 continues to disperse in Asia: damage, ongoing management and future challenges. *J*  
374 *Pest Sci.* 2018; 92: 1317–1327.
- 375 5. Baniameri V. Cheraghian A. The first report and control strategies of *Tuta absoluta* in Iran.  
376 *Bull OEPP.* 2012; 42: 322–324.
- 377 6. Cherif A, Attia-Barhoumi S, Mansour R, Zappalà L, Grissa-Lebdi Ka. Elucidating key  
378 biological parameters of *Tuta absoluta* on different host plants and under various  
379 temperature and relative humidity regimes. *Entomol Gen.* 2019; 39: 1–7.

380

381

- 382 7. Sylla S, Brévault Th, Monticelli LS, Diarra K, Desneux N. Geographic variation of host  
383 preference by the invasive tomato leaf miner *Tuta absoluta*: implications for host range  
384 expansion. *J Pest Sci.* 2019; 92: 1387–1396.
- 385 8. Guedes RNC, Roditakis E, Campos MR, Haddi K, Bielza P, Siqueira HAA, et al. Insecticide  
386 resistance in the tomato pinworm *Tuta absoluta*: patterns, spread, mechanisms,  
387 management and outlook. *J Pest Sci.* 2019; 92:1329–1342.
- 388 9. Desneux N, Decourtye A, Delpuech JM. The sublethal effects of pesticides on beneficial  
389 arthropods. *Annu Rev Entomol.* 2007; 52: 81–106.
- 390 10. Passos LC, Soares MA, Collares LJ, Malagoli I, Desneux N, Carvalho GA. Lethal, sublethal  
391 and transgenerational effects of insecticides on *Macrolophus basicornis*, predator of  
392 *Tuta absoluta*. *Entomol Gen.* 2018; 38: 127–143
- 393 11. Soares MA, Campos MR, Passos LC, Carvalho GA, Haro MM, Lavoit AV, et al. Botanical  
394 insecticide and natural enemies: a potential combination for pest management against  
395 *Tuta absoluta*. *J Pest Sci.* 2019; 92: 1433–1443.
- 396 12. Garcia-del-Pino F, Alabern X, Morton A. Efficacy of soil treatments of entomopathogenic  
397 nematodes against the larvae, pupae and adults of *Tuta absoluta* and their interaction  
398 with the insecticides used against this insect. *BioControl.* 2013; 58: 723–731.
- 399 13. Shalaby HH, Faragalla FH, El-Saadany HM, Ibrahim AA. Efficacy of three  
400 entomopathogenic agents for control the tomato borer, *Tuta absoluta* (Meyrick)  
401 (Lepidoptera: Gelechiidae). *Nat Sci.* 2013; 11: 63–72.

- 402 14. Ghoneim K. Parasitic insects and mites as potential biocontrol agents for a devastating pest  
403 of tomato, *Tuta absoluta* Meyrick (Lepidoptera: Gelechiidae) in the world: a review. Int  
404 J Curr Adv Res. 2014; 2: 81–115.
- 405 15. Ghoneim K. Predatory insects and arachnids as potential biological control agents against the  
406 invasive tomato leafminer, *Tuta absoluta* Meyrick (Lepidoptera: Gelechiidae), in  
407 perspective and prospective. J Entomol Zool. 2014; 2: 52–71.
- 408 16. Gómez-Valderrama J, Herrera L, Uribe-Vélez D, López-Ferber M, Villamizar L. An  
409 immunological method for granulovirus detection in larvae of *Tuta absoluta*: searching  
410 for isolates with prospects for biological control of this pest in Colombia. Int J Pest  
411 Manage. 2014; 60: 136–143.
- 412 17. Sabbour MM, Nayera S. Evaluations of three *Bacillus thuringiensis* against *Tuta absoluta*  
413 (Meyrick) (Lepidoptera: Gelechiidae) in Egypt. Int J Sci Res. 2014; 3: 2067–2073
- 414 18. Dehliz A, Guénaoui Y. Natural enemies of *Tuta absoluta* (Lepidoptera: Gelechiidae) in Oued  
415 Righ region, an arid area of Algeria. A J Entomol. 2015; 8: 72–79.
- 416 19. Zappalà L, Biondi A, Alma A, Al-Jboory I.J, Arnò J, Bayram A, et al. Natural enemies of the  
417 South American moth, *Tuta absoluta*, in Europe, North Africa and Middle East, and  
418 their potential use in pest control strategies. J Pest Sci. 2013; 86: 635–647.
- 419 20. Salas Gervassio NG, Aquino D, Vallina C, Biondi A, Luna MG. A re-examination of *Tuta*  
420 *absoluta* parasitoids in South America for optimized biological control. J Pest Sci. 2019;  
421 92: 1343–1357.

- 422 21. Orr DB, Garcia-Salazar C, Landis DA. *Trichogramma* nontarget impacts: A method for  
423 biological control risk assessment. In: Follett PA, Duan JJ, editors. Nontarget Effects of  
424 Biological Control. Kluwer Academic Publishers; 2000. pp. 111–126.  
425
- 426 22. Cabello T, Gallego JR, Fernandez FJ, Gamez M, Vila E, Pino MD, et al. Biological control  
427 strategies for the South American tomato moth (Lepidoptera: Gelechiidae) in  
428 greenhouse tomatoes. *J Eco Entomol.* 2012; 105: 2085–2096.  
429
- 430 23. Chailleux A, Biondi A, Han P, Tabone E, Desneux N. Suitability of the Pest-Plant System  
431 *Tuta absoluta* (Lepidoptera: Gelechiidae)-Tomato for *Trichogramma* (Hymenoptera:  
432 Trichogrammatidae) Parasitoids and Insights for Biological control. *J Econ Entomol.*  
433 2013; 106: 2310–2321.
- 434 24. El-Arnaouty SA, Pizzol J, Galal HH, Kortam MN, Afifi AI, Beyssat V, et al. Assessment of  
435 Two *Trichogramma* Species for the Control of *Tuta absoluta* in North African Tomato  
436 Greenhouses. *Afr Entomol.* 2014; 22: 801–809
- 437 25. Alsaedi Gh, Ashouri A, Talaei-Hassanloui R. Assessment of two *Trichogramma* species with  
438 *Bacillus thuringiensis* var. kurstaki for the control of the tomato leafminer *Tuta absoluta*  
439 Meyrick (Lepidoptera: Gelechiidae) in Iran. *Open J Ecol.* 2017; 7: 112–124.
- 440 26. Ahmadi S, Poorjavad N. Behavioral and biological effects of exposure to *Tuta absoluta*  
441 (Lepidoptera: Gelechiidae) Sex Pheromone on Several *Trichogramma* (Hymenoptera:  
442 Trichogrammatidae) Populations. *J Eco Entomol.* 2018; 111: 2667–2675.

- 443 27. Mohammadpour M, Hosseini M, Karimi J, Hosseininaveh V. Effect of age-dependent  
444 parasitism in Eggs of *Tuta absoluta* (Lepidoptera: Gelechiidae) on intraguild predation  
445 between *Nabis pseudoferus* (Hemiptera: Nabidae) and *Trichogramma brassicae*  
446 (Hymenoptera: Trichogrammatidae). J Insect Sci. 2019; 19: 27–33.
- 447 28. Parra JRP. Mass rearing of egg parasitoids for biological control programs. In: C onsoli FL,  
448 Parr JRP, Zucchi RA, editors. Egg Parasitoids in Agroecosystems with Emphasis on  
449 *Trichogramma*. Series: Progress of Biological Control. Vol 9. Springer Netherlands;  
450 2010. pp. 267–292.
- 451 29. Thi ry D, Desneux N. Host plants of the polyphagous grapevine moth *Lobesia botrana* during  
452 larval stage modulate moth egg quality and subsequent parasitism by the parasitoid  
453 *Trichogramma cacoeciae*. Entomol Gen. 2018; 38: 47–59.
- 454 30. Guo X, Di N, Chen X, Zhu Z, Zhang F, Tang B, et al. Performance of *Trichogramma pintoi*  
455 when parasitizing eggs of the oriental fruit moth *Grapholita molesta*. Entomol Gen.  
456 2019; 39: 239–249.
- 457 31. Li X-Y, Lei Q, Hua H-Q, Song H-F, Wang S, Ramirez-Romero R, et al. Impact of host  
458 suitability on oviposition preference toward fertilized and unfertilized host eggs in two  
459 *Trichogramma* parasitoid species. Entomol Gen. 2019; 39: 313–323.
- 460 32. Chailleux A, Bearez Ph, Pizzol J, Amiens-Desneux E, Ramirez-Romero R, Desneux N.  
461 Potential for combined use of parasitoids and generalist predators for biological control  
462 of the key invasive tomato pest *Tuta absoluta*. J Pest Sci. 2013; 86: 533–541.

- 463 33. Chailleux A, Desneux N, Seguret J, Do Thi Khanh H, Maignet P, Tabone E. Assessing  
464 European egg parasitoids as a mean of controlling the invasive South American tomato  
465 pinworm *Tuta absoluta*. PLoS One, 2012; 7: 1–8.
- 466 34. Payer R, Mexia A, Pratisoli D, Figueiredo E. Parasitism of South American tomato moth  
467 eggs by *Trichogramma evanescens* (Hymenoptera: Trichogrammatidae). Revista de  
468 Ciências Agrárias. 2012; 35: 236–243.
- 469 35. Schrank A, Vainstein MH. *Metarhizium anisopliae* enzymes and toxins. Toxicon. 2010; 56:  
470 1267–1274.
- 471 36. Kaaya GP, Hassan Sh. Entomogenous fungi as promising biopesticides for tick control. Exp  
472 Appl Acarol. 2000; 24: 913–926.
- 473
- 474 37. Polar P, Moore D, Moses TK, Kairo MTK, Ramsuhag A. Topically applied myco-acaricides  
475 for the control of cattle ticks: overcoming the challenges. Exp Appl Acarol. 2008; 46:  
476 119–148.
- 477 38. Zimmermann G. The entomopathogenic fungus *Metarhizium anisopliae* and its potential as  
478 a biocontrol agent. Pest Manag Sci. 1993; 37: 375–379.
- 479 39. Vega FE, Goettel MS, Blackwell M, Chandler D, Jackson MA, Keller S, et al. Fungal  
480 entomopathogens: new insights on their ecology. Fungal Ecol. 2009; 2: 149–159.
- 481 40. Contreras J, Mendoza JE, Martínez-Aguirre MR, García-Vidal L, Izquierdo J, Bielza P.  
482 Efficacy of entomopathogenic fungus *Metarhizium anisopliae* against *Tuta absoluta*  
483 (Lepidoptera: Gelechiidae). J Eco Entomol. 2014; 107: 121–124.

- 484 41. Sabbour MM, Singer SM. Evaluations of two *Metarhizium* varieties against *Tuta absoluta*  
485 (Meyrick) (Lepidoptera: Gelechiidae) in Egypt. Int J Sci Res. 2014; 3: 1983–1987.
- 486 42. Suh ChP-C, Orr DB, Duyn JWV. Effect of insecticides on *Trichogramma exiguum*  
487 (Trichogrammatidae: Hymenoptera) preimaginal development and adult survival. J Eco  
488 Entomol. 2000; 93: 577–583.
- 489 43. Biondi A, Mommaerts V, Smaghe G, Viñuela E, Zappalà L, Desneux N. The non-target  
490 impact of spinosyns on beneficial arthropods, a review. Pest Manag Sci. 2012; 68: 1523–  
491 1536.
- 492 44. Biondi A, Zappalà L, Stark JD, Desneux N. Do biopesticides affect the demographic traits of  
493 a parasitoid wasp and its biocontrol services through sublethal effects? PLoS One. 2013;  
494 8: 1–11.
- 495 45. Guedes RNC, Smaghe G, Stark JD, Desneux N. Pesticide-Induced Stress in Arthropod Pests  
496 for Optimized Integrated Pest Management Programs. Annu Rev Entomol. 2016; 61:  
497 43–62.
- 498 46. Nozad-Bonab Z, Hejazi MJ, Iranipour Sh, Arzanlou M. Lethal and sublethal effects of some  
499 chemical and biological insecticides on *Tuta absoluta* (Lepidoptera: Gelechiidae) eggs  
500 and neonates. J Eco Entomol. 2017; 110; 1138–1144.
- 501 47. Abbott W. A method of computing the effectiveness of an insecticide. J Eco Entomol 1925;  
502 18: 265–267.
- 503 48. SPSS Base 16.0 User’s Guide. Chicago, IL. 2007; 551 pp .

- 504 49. Carey JR. Applied Demography for Biologists, with Special Emphasis on Insects. Oxford  
505 University Press, New York. 1993; 206 pp.
- 506 50. Koppenhöfer AM, Kaya HK. Additive and synergistic interaction between entomopathogenic  
507 nematodes and *Bacillus thuringiensis* for Scarab Grub control. Biol Control. 1997; 8:  
508 131–137.
- 509 51. Yii JE, Bong CFJ, King JHP, Kadir J. Synergism of entomopathogenic fungus, *Metarhizium*  
510 *anisopliae* incorporated with fipronil against oil palm pest subterranean termite,  
511 *Coptotermes curvignathus*. Plant Prot Sci. 2016; 52: 35–44.
- 512 53. Talebi Kh, Kavousi A, Sabah Q. Impacts of pesticides on arthropod biological control agents.  
513 Pest Technology. 2008; 2: 87–97.
- 514 52. Finney DJ. Probit Analysis. Cambridge Univ. Press, London. Forschler BT, Gardner WA.  
515 1991. Parasitism of *Phyllophaga hirticula* (Coleoptera: Scarabaeidae) by  
516 *Heterorhabditis heliothidis* and *Steinernema carpocapsae*. J Invertebr Pathol. 1964; 58:  
517 713–720.
- 518 54. Fernandes FL, Bacci L, Fernandes MS. Impact and selectivity of insecticides to predators and  
519 parasitoides. EntomoBrasilis. 2010; 3: 01–10.
- 520 55. Hewa-Kapuge S, McDougall S, Hoffmann AA. Effects of methoxyfenozide, indoxacarb, and  
521 other insecticides on the beneficial egg parasitoid *Trichogramma* nr. *brassicae*  
522 (Hymenoptera: Trichogrammatidae) under laboratory and field conditions. J Eco  
523 Entomol. 2003; 96: 1083–1090.



- 524 56. Lundgren JG, Heimpel GE. Quality assessment of three species of commercially produced  
525 *Trichogramma* and the first report of thelytoky in commercially produced  
526 *Trichogramma*. Biol Control. 2003; 26: 68–73.
- 527 57. Afshari A, Gorzolddin M, Motaki E. Side-Effects of indoxacarb and lufenuron on  
528 *Trichogramma brassicae* Bezdenko (Hymenoptera: Trichogrammatidae) under  
529 laboratory conditions. Plant Prot. 2014; 37: 61–80.
- 530 58. Medina P, Morales J, Smagghe G, Viñuela E. Toxicity and kinetics of spinosad in different  
531 developmental stages of the endoparasitoid *Hyposoter Didymator* (Hymenoptera:  
532 Ichneumonidae) and its host *Spodoptera littoralis* larvae (Lepidoptera: Noctuidae).  
533 BioControl. 2008; 53: 569–578.
- 534 59. Ruiz L, Flores S, Cancino J, Arredondo J, Valle J, Díaz-Fleischer F, et al. Lethal and  
535 sublethal effects of spinosad-based GF-120 bait on the Tephritid parasitoid  
536 *Diachasmimorpha longicaudata* (Hymenoptera: Braconidae). Biol Control. 2008; 44:  
537 296–304.
- 538 60. Fernandes MES, Fernandes FL, Picanço MC, Queiroz RB, da Silva RS, Huertas AAG.  
539 Physiological selectivity of insecticides to *Apis mellifera* (Hymenoptera: Apidae) and  
540 *Protonectarina sylveirae* (Hymenoptera: Vespidae) in citrus. Sociobiology. 2008; 51:  
541 1–10.
- 542 61. Schneider MI, Smagghe G, Pineda S, Viñuela E. Action of insect growth regulator  
543 insecticides and spinosad on life history parameters and absorption in third-instar larvae  
544 of the endoparasitoid *Hyposoter didymator*. Biol Control. 2004; 31: 189–198.

- 545 62. C<sup>o</sup>nsoli FL, Botelho PSM, Parra JRP. Selectivity of insecticides to the egg parasitoid  
546 *Trichogramma galloi* Zucchi, 1988, (Hym., Trichogrammatidae). J Appl Entomol.  
547 2001; 125: 37–43.
- 548 63. Hossain MB, Poehling HM. Non-target effects of three biorationale insecticides on two  
549 endolarval parasitoids of *Liriomyza sativae* (Dipt., Agromyzidae). J Appl Entomol.  
550 2006; 130: 360–367.
- 551 64. Blibech I, Ksantini M, Jardak T, Bouaziz M. Effect of insecticides on *Trichogramma*  
552 parasitoides used in biological control against *Prays oleae* insect pest. ACES. 2015; 5:  
553 362–372.
- 554 65. Ahmadipour R, Shakarami J, Farrokhi Sh, Jafari Sh. Evaluation of *Trichogramma brassicae*  
555 native strains as egg parasitoid of tomato leafminer, *Tuta absoluta* (Meyrick) in the  
556 laboratory conditions. Bio Control in Plant Prote. 2015; 2: 109–122.
- 557 66. Wang Y, Yu R, Zhao X, Chen L, Wu Ch, Cang T, et al. Susceptibility of adult *Trichogramma*  
558 *nubilale* (Hymenoptera: Trichogrammatidae) to selected insecticides with different  
559 modes of action. Crop Prot. 2012; 34: 76–82.
- 560 67. C<sup>o</sup>nsoli FL, Parra JRP, Hassan SA. Side-effects of insecticides used in tomato fields on the  
561 egg parasitoid *Trichogramma pretiosum* Riley (Hym., Trichogrammatidae), a natural  
562 enemy of *Tuta absoluta* (Meyrick) (Lep., Gelechiidae). J App Entomol. 1998; 122: 43–  
563 47.

- 564 68. Carvalho GA, Reis PR, Rocha LCD, Moraes JC, Fuini LC, Ecole CC. Side-effects of  
565 insecticides used in tomato fields on *Trichogramma pretiosum* (Hymenoptera,  
566 Trichogrammatidae). Acta Sci Agron. 2003; 25: 275–279.
- 567 69. Sattar Sh, Farmanullah, Saljoqi A, Arif M, Sattar H, Qazi JI. Toxicity of some new  
568 insecticides against *Trichogramma chilonis* (Hymenoptera: Trichogrammatidae) under  
569 laboratory and extended laboratory conditions. Pak J Zool. 2011; 43: 1117–1125.
- 570 70. Delpuech J-M, Gareau E, Terrier O, Fouillet P. Sublethal effects of the insecticide  
571 chlorpyrifos on the sex pheromonal communication of *Trichogramma brassicae*.  
572 Chemosphere. 1998; 36: 1775–1785.
- 573 71. Delpuech J-M, Gareau E, Terrier O, Fouillet P. Modifications of the sex pheromonal  
574 communication of *Trichogramma brassicae* a sublethal dose of deltamethrin.  
575 Chemosphere. 1999; 38: 729–739.
- 576 72. Ashraf Khan M. Lethal and parasitism effects of selected novel pesticides on adult  
577 *Trichogramma chilonis* (Hymenoptera: Trichogrammatidae). J Plant Dis Prot. 2020;  
578 127: 81–90.

579

580

581

582

583

584

585

586

587 Table 1. Summary of probit analysis results and estimated Lethal Concentrations (LC<sub>50</sub> and LC<sub>90</sub>) of the  
588 chemical insecticides tested on *Trichogramma brassicae* juvenile stages within *Tuta absoluta* eggs.

| <b>Pesticides</b>          | <b>Slope ± SE</b>  | <b>LC<sub>50</sub> (mg a.i./l)</b> | <b>LC<sub>90</sub> (mg a.i./l)</b> | <b>Label dose for <i>T. absoluta</i> (ppm)</b> | <b>HQ</b>      | <b>χ<sup>2</sup>(df)</b> | <b>P-Value</b> |
|----------------------------|--------------------|------------------------------------|------------------------------------|------------------------------------------------|----------------|--------------------------|----------------|
| <b>Spinosad</b>            | <b>0.99 ± 0.12</b> | <b>0.14 (0.11 - 0.19)</b>          | <b>2.81 (1.51 – 7.38)</b>          | <b>250</b>                                     | <b>0.00056</b> | <b>0.73 (3)</b>          | <b>0.86</b>    |
| <b>Abamectin</b>           | <b>1.29 ± 0.15</b> | <b>3.12 (2.38 - 3.85)</b>          | <b>30.60 (19.25 – 62.95)</b>       | <b>1200</b>                                    | <b>0.0026</b>  | <b>0.48 (3)</b>          | <b>0.92</b>    |
| <b>Indoxacarb</b>          | <b>1.79 ± 0.20</b> | <b>1.34 (1.13 – 1.56)</b>          | <b>6.95 (5.09 – 11.13)</b>         | <b>600</b>                                     | <b>0.00223</b> | <b>0.34 (3)</b>          | <b>0.95</b>    |
| <b>Chlorantraniliprole</b> | <b>1.14 ± 0.13</b> | <b>0.02 (0.002 - 0.03)</b>         | <b>0.28 (0.17 - 0.61)</b>          | <b>500</b>                                     | <b>0.00004</b> | <b>1.33 (3)</b>          | <b>0.72</b>    |

589

590

591

592

593

594

595

596

597

598

Table 2. Life table parameters (means  $\pm$  SE) estimated for *Trichogramma brassicae* developed on *Tuta absoluta* eggs sprayed with Lethal Concentration 25% (LC<sub>25</sub>) of abamectin, chlorantraniliprole, spinosad, indoxacarb and *Metarhizium anisopliae* 0, 24 and 48 hours prior parasitism.

|                                               | GRR                             | R <sub>0</sub>                  | r <sub>m</sub>                   | λ                                | T                                | DT                                | b                                | d                                  |
|-----------------------------------------------|---------------------------------|---------------------------------|----------------------------------|----------------------------------|----------------------------------|-----------------------------------|----------------------------------|------------------------------------|
| <i>Trichogramma brassicae</i>                 | 42.191 $\pm$ 2.256 <sup>a</sup> | 34.479 $\pm$ 2.509 <sup>a</sup> | 0.347 $\pm$ 0.0085 <sup>a</sup>  | 1.415 $\pm$ 0.0118 <sup>a</sup>  | 10.226 $\pm$ 0.083 <sup>bc</sup> | 1.989 $\pm$ 0.053 <sup>a</sup>    | 0.355 $\pm$ 0.0078 <sup>a</sup>  | 0.007 $\pm$ 0.0007 <sup>a</sup>    |
| <i>T. brassicae</i> + abamectin 0             | 17.883 $\pm$ 2.646 <sup>b</sup> | 8.062 $\pm$ 0.911 <sup>c</sup>  | 0.206 $\pm$ 0.0129 <sup>c</sup>  | 1.229 $\pm$ 0.0157 <sup>c</sup>  | 10.158 $\pm$ 0.144 <sup>bc</sup> | 3.335 $\pm$ 0.232 <sup>abcd</sup> | 0.232 $\pm$ 0.0104 <sup>c</sup>  | 0.025 $\pm$ 0.0026 <sup>abcd</sup> |
| <i>T. brassicae</i> + abamectin 24            | 20.733 $\pm$ 2.884 <sup>b</sup> | 7.549 $\pm$ 0.915 <sup>c</sup>  | 0.203 $\pm$ 0.0139 <sup>c</sup>  | 1.225 $\pm$ 0.0170 <sup>c</sup>  | 10.019 $\pm$ 0.159 <sup>bc</sup> | 3.383 $\pm$ 0.265 <sup>bcd</sup>  | 0.230 $\pm$ 0.0110 <sup>c</sup>  | 0.027 $\pm$ 0.0032 <sup>cde</sup>  |
| <i>T. brassicae</i> + abamectin 48            | 15.653 $\pm$ 1.428 <sup>b</sup> | 7.125 $\pm$ 0.848 <sup>c</sup>  | 0.199 $\pm$ 0.0137 <sup>c</sup>  | 1.221 $\pm$ 0.0165 <sup>c</sup>  | 9.905 $\pm$ 0.143 <sup>b</sup>   | 3.442 $\pm$ 0.268 <sup>bcd</sup>  | 0.228 $\pm$ 0.0107 <sup>c</sup>  | 0.028 $\pm$ 0.0031 <sup>cd</sup>   |
| <i>T. brassicae</i> + chlorantraniliprole 0   | 18.261 $\pm$ 2.546 <sup>b</sup> | 6.722 $\pm$ 0.774 <sup>c</sup>  | 0.190 $\pm$ 0.0126 <sup>c</sup>  | 1.209 $\pm$ 0.0151 <sup>c</sup>  | 10.058 $\pm$ 0.177 <sup>bc</sup> | 3.621 $\pm$ 0.257 <sup>cd</sup>   | 0.220 $\pm$ 0.0097 <sup>c</sup>  | 0.030 $\pm$ 0.0031 <sup>e</sup>    |
| <i>T. brassicae</i> + chlorantraniliprole 24  | 13.568 $\pm$ 1.590 <sup>b</sup> | 6.689 $\pm$ 0.791 <sup>c</sup>  | 0.191 $\pm$ 0.0124 <sup>c</sup>  | 1.210 $\pm$ 0.0149 <sup>c</sup>  | 10.004 $\pm$ 0.128 <sup>b</sup>  | 3.614 $\pm$ 0.249 <sup>cd</sup>   | 0.221 $\pm$ 0.0094 <sup>c</sup>  | 0.030 $\pm$ 0.0031 <sup>e</sup>    |
| <i>T. brassicae</i> + chlorantraniliprole 48  | 11.287 $\pm$ 1.168 <sup>b</sup> | 6.388 $\pm$ 0.779 <sup>c</sup>  | 0.190 $\pm$ 0.0134 <sup>c</sup>  | 1.209 $\pm$ 0.0161 <sup>c</sup>  | 9.831 $\pm$ 0.118 <sup>bc</sup>  | 3.630 $\pm$ 0.280 <sup>bcd</sup>  | 0.219 $\pm$ 0.0103 <sup>c</sup>  | 0.030 $\pm$ 0.0032 <sup>cde</sup>  |
| <i>T. brassicae</i> + spinosad 0              | 15.386 $\pm$ 1.611 <sup>b</sup> | 6.841 $\pm$ 0.882 <sup>c</sup>  | 0.192 $\pm$ 0.0143 <sup>c</sup>  | 1.211 $\pm$ 0.0172 <sup>c</sup>  | 10.081 $\pm$ 0.177 <sup>bc</sup> | 3.585 $\pm$ 0.292 <sup>cd</sup>   | 0.221 $\pm$ 0.0111 <sup>c</sup>  | 0.029 $\pm$ 0.0034 <sup>e</sup>    |
| <i>T. brassicae</i> + spinosad 24             | 13/387 $\pm$ 2.207 <sup>b</sup> | 6.572 $\pm$ 0.918 <sup>c</sup>  | 0.192 $\pm$ 0.0160 <sup>c</sup>  | 1.211 $\pm$ 0.0191 <sup>c</sup>  | 9.925 $\pm$ 0.124 <sup>bc</sup>  | 3.558 $\pm$ 0.355 <sup>cd</sup>   | 0.221 $\pm$ 0.012 <sup>c</sup>   | 0.029 $\pm$ 0.0039 <sup>e</sup>    |
| <i>T. brassicae</i> + spinosad 48             | 14.741 $\pm$ 1.579 <sup>b</sup> | 7.502 $\pm$ 0.878 <sup>c</sup>  | 0.201 $\pm$ 0.0133 <sup>c</sup>  | 1.222 $\pm$ 0.0161 <sup>c</sup>  | 10.094 $\pm$ 0.173 <sup>b</sup>  | 3.411 $\pm$ 0.263 <sup>cd</sup>   | 0.228 $\pm$ 0.0103 <sup>c</sup>  | 0.027 $\pm$ 0.0032 <sup>e</sup>    |
| <i>T. brassicae</i> + indoxacarb 0            | 14.668 $\pm$ 1.487 <sup>b</sup> | 5.966 $\pm$ 0.829 <sup>c</sup>  | 0.180 $\pm$ 0.0154 <sup>c</sup>  | 1.197 $\pm$ 0.0184 <sup>c</sup>  | 9.988 $\pm$ 0.152 <sup>bc</sup>  | 3.818 $\pm$ 0.356 <sup>d</sup>    | 0.213 $\pm$ 0.0118 <sup>a</sup>  | 0.033 $\pm$ 0.0038 <sup>e</sup>    |
| <i>T. brassicae</i> + indoxacarb 24           | 14.101 $\pm$ 1.500 <sup>b</sup> | 5.971 $\pm$ 0.715 <sup>c</sup>  | 0.177 $\pm$ 0.0131 <sup>c</sup>  | 1.194 $\pm$ 0.0154 <sup>c</sup>  | 10.139 $\pm$ 0.137 <sup>bc</sup> | 3.874 $\pm$ 0.320 <sup>d</sup>    | 0.210 $\pm$ 0.0098 <sup>a</sup>  | 0.033 $\pm$ 0.0034 <sup>e</sup>    |
| <i>T. brassicae</i> + indoxacarb 48           | 13.619 $\pm$ 1.175 <sup>b</sup> | 6.037 $\pm$ 0.698 <sup>c</sup>  | 0.178 $\pm$ 0.0127 <sup>c</sup>  | 1.195 $\pm$ 0.0151 <sup>c</sup>  | 10.129 $\pm$ 0.129 <sup>bc</sup> | 3.852 $\pm$ 0.306 <sup>d</sup>    | 0.210 $\pm$ 0.0096 <sup>a</sup>  | 0.032 $\pm$ 0.0033 <sup>e</sup>    |
| <i>T. brassicae</i> + <i>M. anisopliae</i> 0  | 45.335 $\pm$ 2.668 <sup>a</sup> | 25.036 $\pm$ 2.699 <sup>b</sup> | 0.301 $\pm$ 0.0114 <sup>ab</sup> | 1.351 $\pm$ 0.0153 <sup>ab</sup> | 10.713 $\pm$ 0.167 <sup>c</sup>  | 2.299 $\pm$ 0.087 <sup>ab</sup>   | 0.312 $\pm$ 0.0101 <sup>ab</sup> | 0.011 $\pm$ 0.0014 <sup>ab</sup>   |
| <i>T. brassicae</i> + <i>M. anisopliae</i> 24 | 40.893 $\pm$ 3.378 <sup>a</sup> | 20.605 $\pm$ 2.133 <sup>b</sup> | 0.284 $\pm$ 0.0101 <sup>b</sup>  | 1.328 $\pm$ 0.0134 <sup>b</sup>  | 10.663 $\pm$ 0.175 <sup>c</sup>  | 2.436 $\pm$ 0.0870 <sup>abc</sup> | 0.298 $\pm$ 0.0087 <sup>b</sup>  | 0.013 $\pm$ 0.0015 <sup>abc</sup>  |
| <i>T. brassicae</i> + <i>M. anisopliae</i> 48 | 35.431 $\pm$ 2.875 <sup>a</sup> | 18.338 $\pm$ 1.867 <sup>b</sup> | 0.277 $\pm$ 0.0100 <sup>b</sup>  | 1.319 $\pm$ 0.0132 <sup>b</sup>  | 10.515 $\pm$ 0.148 <sup>bc</sup> | 2.498 $\pm$ 0.0910 <sup>abc</sup> | 0.291 $\pm$ 0.0086 <sup>b</sup>  | 0.014 $\pm$ 0.0016 <sup>abcd</sup> |
| Df of between group                           | 15                              | 15                              | 15                               | 15                               | 15                               | 15                                | 15                               | 15                                 |
| Total df                                      | 669                             | 669                             | 669                              | 669                              | 669                              | 669                               | 669                              | 669                                |
| F                                             | 29.269                          | 37.014                          | 16.414                           | 17.144                           | 3.202                            | 5.873                             | 18.517                           | 3.352                              |
| P-value                                       | 0 <0.0001                       | 0 <0.0001                       | 0 <0.0001                        | 0 <0.0001                        | 0 <0.0001                        | 0.00106                           | 0 <0.0001                        | 0 <0.0001                          |

Table 3. The mortality rate of *Tuta absoluta* in an integrated system including the parasitoid *Trichogramma brassicae* + each one of the entomopathogenic fungus, *Metarhizium anisopliae*, or chemical insecticides, spinosad, abamectin, indoxacarb and chlorantraniliprole

| Combination                                | Time (h) of the parasitoid | % observed mortality | % expected mortality | $\chi^2$ (df) | Type of effect |
|--------------------------------------------|----------------------------|----------------------|----------------------|---------------|----------------|
| Spinosad + parasitoid                      | 0                          | 74.47                | 71.11                | 0.16 (1)      | additive       |
|                                            | 24                         | 77.54                | 68.84                | 1.10 (1)      | additive       |
|                                            | 48                         | 78.39                | 68.18                | 1.53 (1)      | additive       |
| Abamectin + parasitoid                     | 0                          | 68.82                | 74.15                | 0.38 (1)      | antagonistic   |
|                                            | 24                         | 70.52                | 70.48                | 0.28 (1)      | additive       |
|                                            | 48                         | 74.53                | 67.32                | 0.77 (1)      | additive       |
| Indoxacarb + parasitoid                    | 0                          | 70.46                | 69.59                | 0.01 (1)      | additive       |
|                                            | 24                         | 72.03                | 68.02                | 0.24 (1)      | additive       |
|                                            | 48                         | 71.68                | 69.90                | 0.04 (1)      | additive       |
| Chlorantraniliprole + parasitoid           | 0                          | 73.25                | 73.39                | 0.0003 (1)    | antagonistic   |
|                                            | 24                         | 74.10                | 68.84                | 0.40 (1)      | additive       |
|                                            | 48                         | 74.84                | 67.32                | 0.84 (1)      | additive       |
| <i>Metarhizium anisopliae</i> + parasitoid | 0                          | 94.30                | 76.44                | 4.17 (1)      | synergistic    |
|                                            | 24                         | 94.30                | 84                   | 1.26 (1)      | additive       |
|                                            | 48                         | 95                   | 84                   | 1.44 (1)      | additive       |
